# Supplementary material for: Mast Cell Cytonemes as a Defense Mechanism against Coxiella burnetii
Source: PubMed Central journal article supplement (PMC6469977; doi:10.1128/mbio.02669-18), 2019-04-16

**Figure S1. Monocyte as permissive cells for *C. burnetii*.** Confocal pictures of monocytes incubated with *C. burnetii* for 4 hours (MOI 50:1). Bacteria are indicated in red, F-actin in green and nucleus in blue.

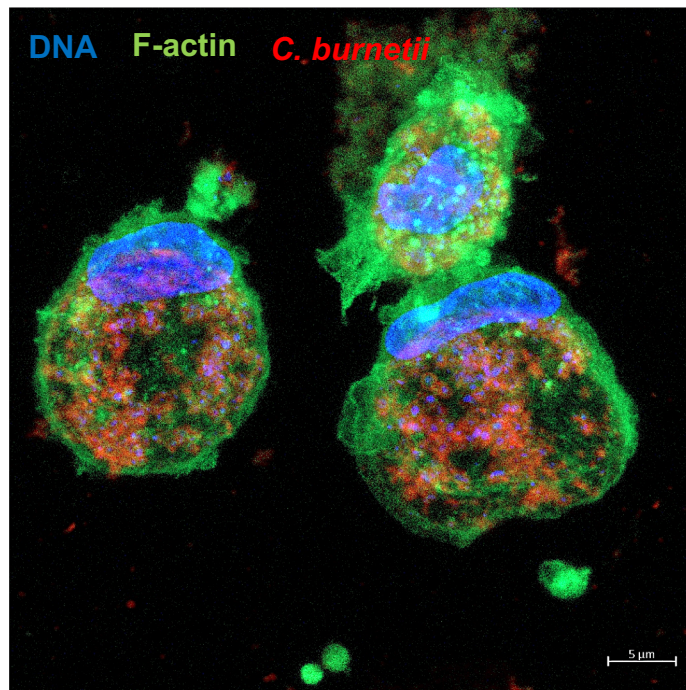

Supplement: mBio.02669-18-sf001.pdf [file mBio.02669-18-sf001.pdf]
