# Supplementary material for: Mast Cell Cytonemes as a Defense Mechanism against Coxiella burnetii
Source: PubMed Central journal article supplement (PMC6469977; doi:10.1128/mbio.02669-18), 2019-04-16

**Figure S2. MC cytonemes in response to Guyana strain**

The formation of cytonemes was quantified after a 3 hours incubation of MCs with high virulent (Guyana) bacteria. The results are expressed in percentage relative to PMA stimulation.

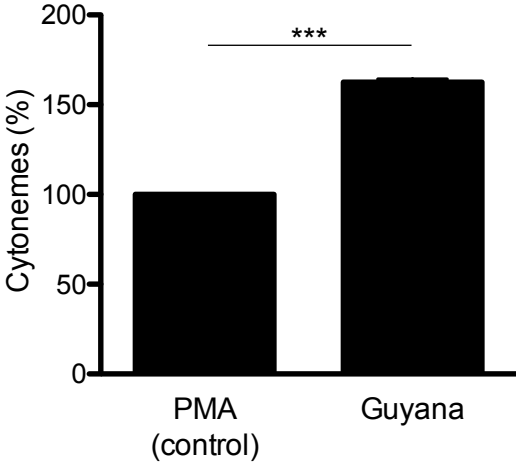

Supplement: mBio.02669-18-sf002.pdf [file mBio.02669-18-sf002.pdf]
