# Supplementary material for: Mast Cell Cytonemes as a Defense Mechanism against Coxiella burnetii
Source: PubMed Central journal article supplement (PMC6469977; doi:10.1128/mbio.02669-18), 2019-04-16

### Figure S3. Isolation and characterization of pMCs

Placental cells from healthy donors were collected after enzymatic trypsinic digestion and Percoll cushion procedure. **(A)** The presence of pMCs in total placental cells were observed by flow cytometry using  $Fc\epsilon R1^+/CD117^+$  and **(B)** tryptase staining. **(C)** Placental MCs were isolated using double magnetic beads selection and their morphology and granularity were observed by colorations including MGG (upper panel) and toluidine blue (lower panel, black arrows), **(D)** scanning electron and **(E)** confocal microscopy (DNA (blue), F-actin (green) and tryptase (red)). Data are the mean  $\pm$  SD of triplicate samples and are representative of three experiments. \* $p \leq 0.05$  and \*\* $p \leq 0.01$ .

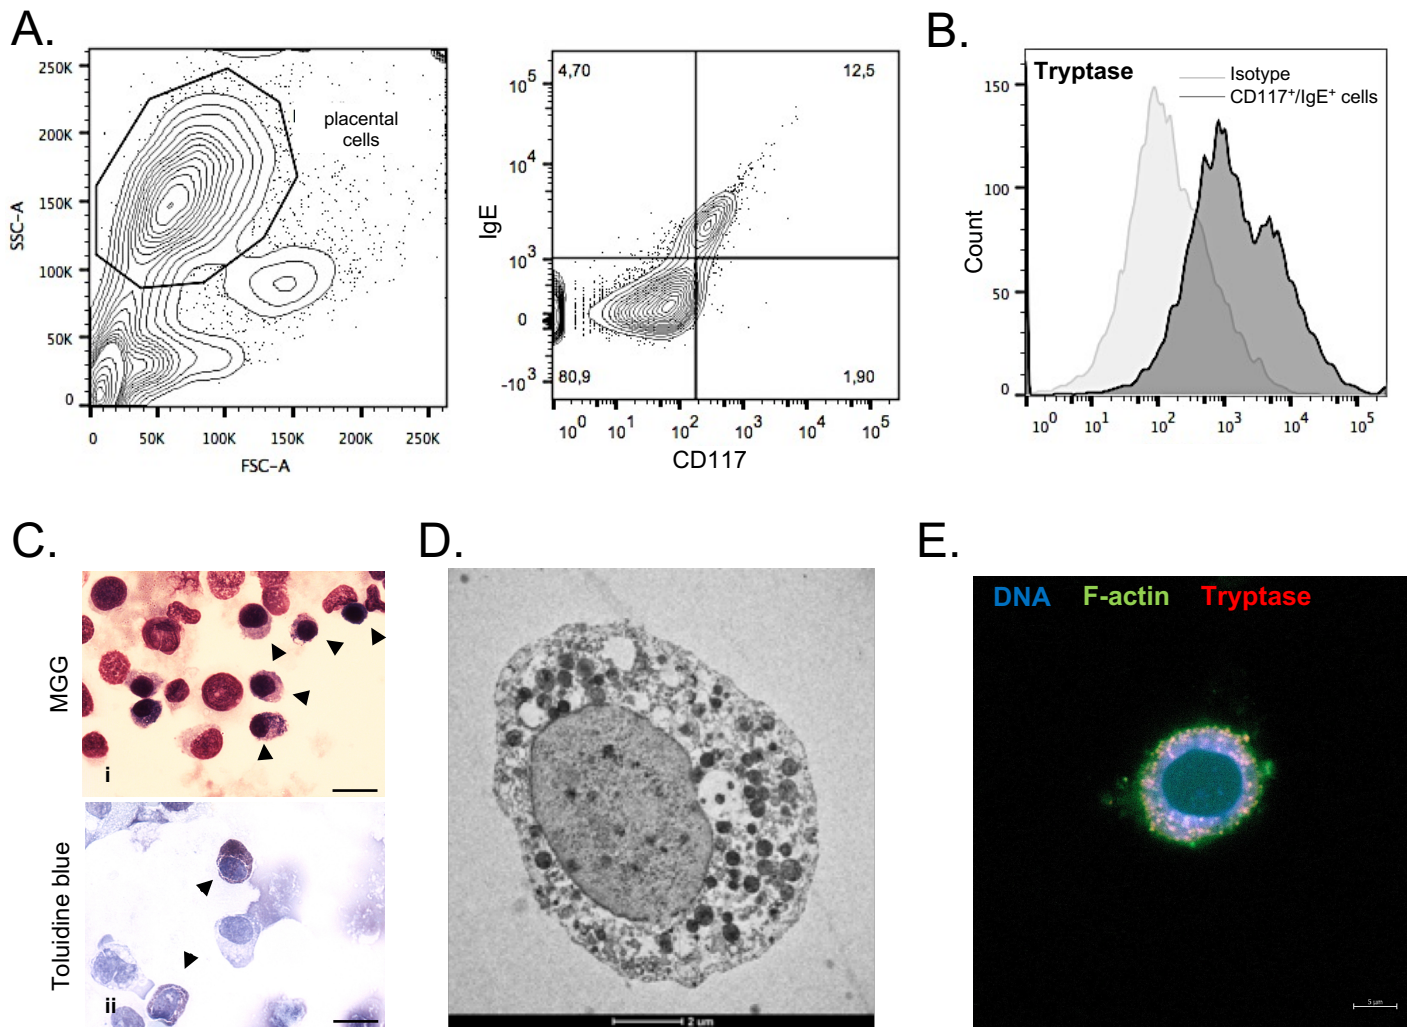

Supplement: mBio.02669-18-sf003.pdf [file mBio.02669-18-sf003.pdf]
