# Supplementary material for: Mast Cell Cytonemes as a Defense Mechanism against Coxiella burnetii
Source: PubMed Central journal article supplement (PMC6469977; doi:10.1128/mbio.02669-18), 2019-04-16

**Figure S5. Cytoneme quantification.** The area of extracellular F-actin filament, as cytonemes, was quantified in PMA-stimulated MCs at 15, 60 and 180 minutes post-stimulation.

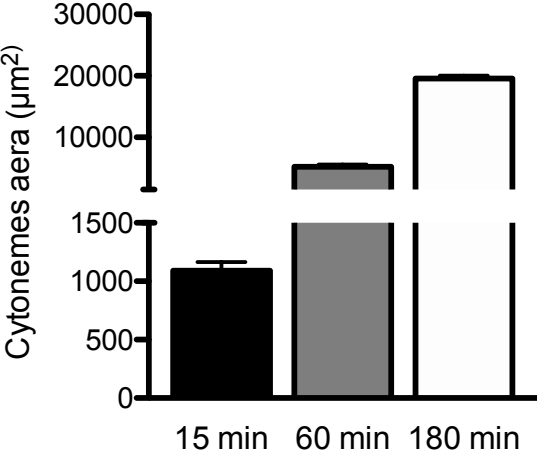

Supplement: mBio.02669-18-sf005.pdf [file mBio.02669-18-sf005.pdf]
