# Supplementary material for: Mast Cell Cytonemes as a Defense Mechanism against Coxiella burnetii
Source: PubMed Central journal article supplement (PMC6469977; doi:10.1128/mbio.02669-18), 2019-04-16
Supplement: mBio.02669-18-st001.pdf [file mBio.02669-18-st001.pdf]

**Table S1. Sequences and gene name of the specific primers used for qRT-PCR**

| <b>Gene Symbol</b> | <b>Forward</b>          | <b>Reverse</b>          |
|--------------------|-------------------------|-------------------------|
| <b>TMEM231</b>     | agaataccaagcagtcagtg    | gaagcagctccatgtgtcttg   |
| <b>CD36</b>        | tgtaggctgcatccatatct    | tgtggtagtaacagggtagcga  |
| <b>OCRL</b>        | gccgtatgaaaagaccaatccg  | tagaagccagatctccttgga   |
| <b>CYLD</b>        | ctcaagtccacctcatccgaa   | tcaaagaagagccaggcagaat  |
| <b>IL-36G</b>      | catgcaagtatccagaggctct  | aatgatgggctggctctcttg   |
| <b>TRIM62</b>      | tggaggttgattccctacttc   | cataagaggggtgctgtgtgtct |
| <b>LNX1</b>        | agaatgaccgtgtgtagccat   | gagagattcaccgggggtctttt |
| <b>DST</b>         | ccacaccagcctaataatgaact | ttgtaactgacgaccctgagtg  |
| <b>PRRG1</b>       | ctaggctcggcagaaataggag  | aacctccccatgtttcttgt    |
| <b>CENPJ</b>       | gccactgaaccactgaacttc   | tcttccatctgcactcacttc   |
| <b>RALGPS2</b>     | attagcttaaactggggccctc  | caccttgtttgcagaagatg    |
