# Supplementary material for: Mast Cell Cytonemes as a Defense Mechanism against Coxiella burnetii
Source: PubMed Central journal article supplement (PMC6469977; doi:10.1128/mbio.02669-18), 2019-04-16
Supplement: mBio.02669-18-st002.pdf [file mBio.02669-18-st002.pdf]

**Table S2. Microarray data validation by qRT-PCR**

| Gene symbol    | FC (virulent- <i>C. burnetii</i> ) |         | FC (avirulent variant) |         |
|----------------|------------------------------------|---------|------------------------|---------|
|                | Microarray                         | qRT-PCR | Microarray             | qRT-PCR |
| <b>TMEM231</b> | 2.04                               | 1.58    | 1.47                   | 0.29    |
| <b>OCRL</b>    | 2.06                               | 1.65    | -1.01                  | 0.16    |
| <b>CYLD</b>    | 2.88                               | 1.89    | 1.02                   | 1.12    |
| <b>IL36G</b>   | 4.56                               | 3.27    | 1.18                   | 2.65    |
| <b>TRIM62</b>  | 1.69                               | 2.61    | 1.22                   | 1.26    |
| <b>LNX1</b>    | 2.27                               | 1.45    | -1.17                  | 1.09    |
| <b>DST</b>     | 1.76                               | 1.62    | -1.21                  | 0.36    |
| <b>PRRG1</b>   | 2.44                               | 1.08    | -1.03                  | 0.78    |
| <b>CENPJ</b>   | 1.54                               | 1.23    | 1.19                   | 1.58    |
| <b>RALGPS2</b> | 1.50                               | 0.97    | -1.02                  | 1.43    |
